# Supplementary material for: The very first normal-pressure tin borate Sn3B4O9, and the intermediate Sn2[B7O12]F
Source: Royal Society of Chemistry journal article supplement (doi:10.1039/c9dt01901d), 2019-01-01
Supplement: c9dt01901d1.pdf [file c9dt01901d1.pdf]

## Supporting Information

### The First Ambient-Pressure Tin Borate $\text{Sn}_3\text{B}_4\text{O}_9$ and $\text{Sn}_2[\text{B}_7\text{O}_{12}]\text{F}$

Table S1: Crystal data and details of the structure refinement of  $\text{Sn}_3\text{B}_4\text{O}_9$  and  $\text{Sn}_2[\text{B}_7\text{O}_{12}]\text{F}$ .

| Sum formula                                                                                                         | $\text{Sn}_3\text{B}_4\text{O}_9$                                                     | $\text{Sn}_2[\text{B}_7\text{O}_{12}]\text{F}$                                         |
|---------------------------------------------------------------------------------------------------------------------|---------------------------------------------------------------------------------------|----------------------------------------------------------------------------------------|
| Molar mass / g·mol <sup>-1</sup>                                                                                    | 543.65                                                                                | 524.05                                                                                 |
| Crystal system                                                                                                      | monoclinic                                                                            | monoclinic                                                                             |
| Space group                                                                                                         | $P2_1/n$ (No. 14)                                                                     | $C2/c$ (No. 15)                                                                        |
| <i>a</i> / pm                                                                                                       | 768.07(3)                                                                             | 1037.99(2)                                                                             |
| <i>b</i> / pm                                                                                                       | 1206.78(4)                                                                            | 859.78(2)                                                                              |
| <i>c</i> / pm                                                                                                       | 924.96(3)                                                                             | 2370.71(8)                                                                             |
| $\beta$ / °                                                                                                         | 101.8470(10)                                                                          | 93.5650(10)                                                                            |
| cell volume / ·10 <sup>6</sup> pm <sup>3</sup>                                                                      | 839.08(5)                                                                             | 2111.63(10)                                                                            |
| <i>Z</i>                                                                                                            | 4                                                                                     | 8                                                                                      |
| $\rho_{\text{x-ray}}$ / g·cm <sup>-3</sup>                                                                          | 4.301                                                                                 | 3.297                                                                                  |
| Crystal dimensions / mm <sup>3</sup>                                                                                | 0.110 × 0.060 × 0.030                                                                 | 0.080 × 0.025 × 0.010                                                                  |
| Crystal shape                                                                                                       | rod                                                                                   | block                                                                                  |
| Colour                                                                                                              | colourless                                                                            | colourless                                                                             |
| Absorption coefficient $\mu$ / mm <sup>-1</sup>                                                                     | 8.890                                                                                 | 4.814                                                                                  |
| <i>F</i> (000)                                                                                                      | 968                                                                                   | 1920                                                                                   |
| Used diffractometer                                                                                                 | Bruker D8 Venture                                                                     | Bruker D8 Venture                                                                      |
| Radiation   $\lambda$ / nm                                                                                          | Mo-K $\alpha$   0.071073                                                              | Mo-K $\alpha$   0.071073                                                               |
| Temperature / K                                                                                                     | 298(2)                                                                                | 297(2)                                                                                 |
| Index range $h_{\text{min.}} k_{\text{min.}} l_{\text{min.}};$<br>$h_{\text{max.}} k_{\text{max.}} l_{\text{max.}}$ | -15 0 0; 14 24 18                                                                     | -14 -12 -33; 14 12 33                                                                  |
| Measured angle / °                                                                                                  | $2.813 \leq \theta \leq 44.996$                                                       | $3.079 \leq \theta \leq 30.000$                                                        |
| Measured peak intensities                                                                                           | 13906                                                                                 | 36715                                                                                  |
| Symmetry independent peaks                                                                                          | 13906                                                                                 | 3084                                                                                   |
| Observed peaks ( $I > 2\sigma$ )                                                                                    | 10550                                                                                 | 2674                                                                                   |
| Absorption correction                                                                                               | Multi-Scan                                                                            | Multi-Scan                                                                             |
| Transmission factor (min. / max.)                                                                                   | 0.441 / 0.776                                                                         | 0.6858 / 0.7479                                                                        |
| $R_{\text{int}}$                                                                                                    |                                                                                       | 0.054                                                                                  |
| Refined parameters   restraints                                                                                     | 147   0                                                                               | 199   0                                                                                |
| $R_{\sigma}$                                                                                                        | 0.0356                                                                                | 0.024                                                                                  |
| $R_1$ (all data)                                                                                                    | 0.0276                                                                                | 0.045                                                                                  |
| $wR_2$ (all data)                                                                                                   | 0.0704                                                                                | 0.069                                                                                  |
| Weighing scheme                                                                                                     | $\omega^{-1} = \sigma^2 F_o^2 + (0.0237P)^2$<br>+1.1434P;<br>$P = (F_o^2 + 2F_c^2)/3$ | $\omega^{-1} = \sigma^2 F_o^2 + (0.0210P)^2$<br>+27.7161P;<br>$P = (F_o^2 + 2F_c^2)/3$ |
| Goof                                                                                                                | 1.098                                                                                 | 1.158                                                                                  |

**Table S2: Results of the MAPLE calculations, regarding the ligands of the tin and boron atoms in Sn<sub>3</sub>B<sub>4</sub>O<sub>9</sub>.**

| #                      | atom       | x      | y      | z      | distance / pm | e-EC <sub>o</sub> N(1) | e-EC <sub>o</sub> N(3) |
|------------------------|------------|--------|--------|--------|---------------|------------------------|------------------------|
| ZT                     | <b>Sn1</b> | 0.3419 | 0.8544 | 0.3671 |               |                        |                        |
| 1                      | O4         | 0.1670 | 0.7521 | 0.4679 | 217.087       | 1.065                  | 1.067                  |
| 2                      | O3         | 0.5457 | 0.7316 | 0.4508 | 217.862       | 1.037                  | 1.039                  |
| 3                      | O1         | 0.2408 | 0.7409 | 0.1919 | 214.211       | 1.010                  | 1.011                  |
| 4                      | O6         | 0.0691 | 0.9046 | 0.1494 | 266.083       | 0.059                  | 0.060                  |
| next ligand:           |            |        |        |        |               |                        |                        |
| 5                      | O8         | 0.4244 | 0.7712 | 0.6633 | 286.446       | 0.017                  | 0.017                  |
| last ligand:           |            |        |        |        |               |                        |                        |
| 21                     | O8         | 0.5756 | 1.2288 | 0.3367 | 489.159       | 0.000                  | 0.000                  |
| coordination number: 4 |            |        |        |        |               |                        |                        |

| #                      | atom       | x      | y      | z      | distance / pm | e-EC <sub>o</sub> N(1) | e-EC <sub>o</sub> N(5) |
|------------------------|------------|--------|--------|--------|---------------|------------------------|------------------------|
| ZT                     | <b>Sn2</b> | 0.8995 | 0.8336 | 0.5486 |               |                        |                        |
| 1                      | O1         | 0.7408 | 0.7591 | 0.6919 | 217.128       | 1.116                  | 1.137                  |
| 2                      | O5         | 1.1196 | 0.7609 | 0.7118 | 220.399       | 1.115                  | 1.136                  |
| 3                      | O2         | 0.8354 | 0.6761 | 0.4327 | 218.796       | 1.047                  | 1.068                  |
| 4                      | O4         | 1.167  | 0.7521 | 0.4679 | 252.452       | 0.395                  | 0.411                  |
| next ligand:           |            |        |        |        |               |                        |                        |
| 5                      | O9         | 1.0762 | 0.9326 | 0.8102 | 278.853       | 0.0380                 | 0.042                  |
| last ligand:           |            |        |        |        |               |                        |                        |
| 22                     | O7         | 1.2449 | 1.0987 | 0.8682 | 477.370       | 0.000                  | 0.000                  |
| coordination number: 4 |            |        |        |        |               |                        |                        |

| #                      | atom       | x      | y      | z      | distance / pm | e-EC <sub>o</sub> N(1) | e-EC <sub>o</sub> N(3) |
|------------------------|------------|--------|--------|--------|---------------|------------------------|------------------------|
| ZT                     | <b>Sn3</b> | 0.9562 | 0.3890 | 0.6572 |               |                        |                        |
| 1                      | O2         | 1.1646 | 0.3239 | 0.5673 | 210.132       | 1.089                  | 1.097                  |
| 2                      | O4         | 0.8330 | 0.2479 | 0.5321 | 216.455       | 1.071                  | 1.079                  |
| 3                      | O8         | 1.0756 | 0.2712 | 0.8367 | 223.46        | 0.855                  | 0.863                  |
| next ligand:           |            |        |        |        |               |                        |                        |
| 4                      | O1         | 0.7592 | 0.2591 | 0.8081 | 275.010       | 0.031                  | 0.032                  |
| last ligand:           |            |        |        |        |               |                        |                        |
| 24                     | O1         | 0.7408 | 0.7591 | 0.6919 | 479.685       | 0.000                  | 0.000                  |
| coordination number: 3 |            |        |        |        |               |                        |                        |

| #                      | atom      | x      | y      | z      | distance / pm | e-EC <sub>o</sub> N(1) | e-EC <sub>o</sub> N(2) |
|------------------------|-----------|--------|--------|--------|---------------|------------------------|------------------------|
| ZT                     | <b>B1</b> | 0.5714 | 0.7119 | 0.6115 |               |                        |                        |
| 1                      | O3        | 0.5457 | 0.7316 | 0.4508 | 147.790       | 1.102                  | 1.102                  |
| 2                      | O8        | 0.4244 | 0.7712 | 0.6633 | 149.586       | 1.002                  | 1.002                  |
| 3                      | O6        | 0.5691 | 0.5954 | 0.6494 | 145.036       | 0.953                  | 0.953                  |
| 4                      | O1        | 0.7408 | 0.7591 | 0.6919 | 147.433       | 0.928                  | 0.928                  |
| next ligand:           |           |        |        |        |               |                        |                        |
| 9                      | O7        | 0.2551 | 0.5987 | 0.6318 | 282.670       | 0.000                  | 0.000                  |
| last ligand:           |           |        |        |        |               |                        |                        |
| 19                     | O9        | 1.0762 | 0.9326 | 0.8102 | 475.188       | 0.000                  | 0.000                  |
| coordination number: 4 |           |        |        |        |               |                        |                        |

| #                      | atom         | x      | y      | z      | distance / pm | e-ECoN(1) | e-ECoN(2) |
|------------------------|--------------|--------|--------|--------|---------------|-----------|-----------|
| ZT                     | <b>B2</b>    | 0.4126 | 0.5410 | 0.6532 |               |           |           |
| 1                      | O9           | 0.4238 | 0.4326 | 0.6898 | 134.944       | 1.068     | 1.068     |
| 2                      | O6           | 0.5691 | 0.5954 | 0.6494 | 137.643       | 0.976     | 0.977     |
| 3                      | O7           | 0.2551 | 0.5987 | 0.6318 | 137.426       | 0.948     | 0.948     |
|                        | next ligand: |        |        |        |               |           |           |
| 4                      | O8           | 0.4244 | 0.7712 | 0.6633 | 277.996       | 0.000     | 0.000     |
|                        | last ligand: |        |        |        |               |           |           |
| 22                     | O1           | 0.2408 | 0.7409 | 0.1919 | 484.305       | 0.000     | 0.000     |
| coordination number: 3 |              |        |        |        |               |           |           |

| #                      | atom         | x      | y      | z      | distance / pm | e-ECoN(1) | e-ECoN(2) |
|------------------------|--------------|--------|--------|--------|---------------|-----------|-----------|
| ZT                     | <b>B3</b>    | 0.2458 | 0.7197 | 0.6235 |               |           |           |
| 1                      | O8           | 0.4244 | 0.7712 | 0.6633 | 148.175       | 1.048     | 1.047     |
| 2                      | O5           | 0.1196 | 0.7609 | 0.7118 | 147.590       | 1.044     | 1.044     |
| 3                      | O4           | 0.1670 | 0.7521 | 0.4679 | 149.415       | 1.035     | 1.034     |
| 4                      | O7           | 0.2551 | 0.5987 | 0.6318 | 146.356       | 0.851     | 0.850     |
|                        | next ligand: |        |        |        |               |           |           |
| 5                      | O6           | 0.5691 | 0.5954 | 0.6494 | 286.919       | 0.000     | 0.000     |
|                        | last ligand: |        |        |        |               |           |           |
| 20                     | O6           | 0.4309 | 0.4046 | 0.3506 | 493.167       | 0.000     | 0.000     |
| coordination number: 4 |              |        |        |        |               |           |           |

| #                      | atom         | x       | y      | z      | distance / pm | e-ECoN(1) | e-ECoN(2) |
|------------------------|--------------|---------|--------|--------|---------------|-----------|-----------|
| ZT                     | <b>B4</b>    | 0.3417  | 0.3259 | 0.6452 |               |           |           |
| 1                      | O2           | 0.1646  | 0.3239 | 0.5673 | 140.257       | 1.196     | 1.200     |
| 2                      | O3           | 0.4543  | 0.2684 | 0.5492 | 152.759       | 0.913     | 0.916     |
| 3                      | O5           | 0.3804  | 0.2609 | 0.7882 | 151.413       | 0.910     | 0.914     |
| 4                      | O9           | 0.4238  | 0.4326 | 0.6898 | 145.578       | 0.909     | 0.913     |
|                        | next ligand: |         |        |        |               |           |           |
| 5                      | O8           | 0.0756  | 0.2712 | 0.8367 | 303.920       | 0.000     | 0.000     |
|                        | last ligand: |         |        |        |               |           |           |
| 21                     | O6           | -0.0691 | 0.0954 | 0.8506 | 487.537       | 0.000     | 0.000     |
| coordination number: 4 |              |         |        |        |               |           |           |

**Table S3: Results for the MAPLE calculations for all atoms in Sn<sub>3</sub>B<sub>4</sub>O<sub>9</sub>, regarding charge, distance, obtained charge, partial maple factor (PMF) and MAPLE energies (\*MAPLE: MAPLE / charge).**

|                                        | charge  | distance / pm | obtained charge | PMF                                           | MAPLE     | *MAPLE   |
|----------------------------------------|---------|---------------|-----------------|-----------------------------------------------|-----------|----------|
| Sn1                                    | +2.0000 | 145.04        | -3.15413        | 6.38445                                       | 1569.8554 | 174.4284 |
| Sn2                                    | +2.0000 | 134.94        | -2.97120        | 6.01417                                       | 1478.8092 | 164.3121 |
| Sn3                                    | +2.0000 | 146.36        | -3.16339        | 6.40320                                       | 1574.4661 | 174.9407 |
| B1                                     | +3.0000 | 140.26        | -3.25799        | 6.59469                                       | 1621.5514 | 180.1724 |
| B2                                     | +3.0000 | 214.21        | -1.37102        | 1.85011                                       | 454.9175  | 113.7294 |
| B3                                     | +3.0000 | 217.13        | -1.42032        | 1.91664                                       | 471.2765  | 117.8191 |
| B4                                     | +3.0000 | 210.13        | -1.43949        | 1.94250                                       | 477.6362  | 119.409  |
| O1                                     | -2.0000 | 147.43        | 1.57584         | 2.12650                                       | 522.8806  | 130.7202 |
| O2                                     | -2.0000 | 140.26        | 1.66291         | 2.24400                                       | 551.7707  | 137.9427 |
| O3                                     | -2.0000 | 147.79        | 1.88752         | 2.54709                                       | 626.2976  | 156.5744 |
| O4                                     | -2.0000 | 149.42        | 1.59677         | 2.15474                                       | 529.8244  | 132.4561 |
| O5                                     | -2.0000 | 147.59        | 1.83635         | 2.47804                                       | 609.3196  | 152.3299 |
| O6                                     | -2.0000 | 137.64        | 2.17114         | 2.92982                                       | 720.4067  | 180.1017 |
| O7                                     | -2.0000 | 137.43        | 2.14852         | 2.89930                                       | 712.9019  | 178.2255 |
| O8                                     | -2.0000 | 148.17        | 2.00892         | 2.71091                                       | 666.5792  | 166.6448 |
| O9                                     | -2.0000 | 134.94        | 2.12913         | 2.87313                                       | 706.4671  | 176.6168 |
| Madelung constant:                     |         |               |                 | 54.0693 ± 0.000002                            |           |          |
| Coulomb portion of the lattice energy: |         |               |                 | 13294.96000 ± 0.000597 kcal·mol <sup>-1</sup> |           |          |
| Coulomb portion of the lattice energy: |         |               |                 | 55652.7162 ± 0.002500 kJ·mol <sup>-1</sup>    |           |          |

**Table S4: Results of the MAPLE calculations, regarding the ligands of the tin atoms in Sn<sub>2</sub>[B<sub>7</sub>O<sub>12</sub>]F.**

| #                      | atom | x      | y      | z       | distance / pm | e-ECoN(1) | e-ECoN(3) |
|------------------------|------|--------|--------|---------|---------------|-----------|-----------|
| ZT                     | Sn1  | 0.4041 | 0.6683 | 0.0053  |               |           |           |
| 1                      | O7   | 0.5917 | 0.5800 | 0.0273  | 212.397       | 1.163     | 1.185     |
| 2                      | F1   | 0.3465 | 0.5729 | 0.0792  | 205.653       | 1.147     | 1.170     |
| 3                      | O7   | 0.4083 | 0.4200 | -0.0273 | 227.175       | 0.762     | 0.784     |
| 4                      | O46  | 0.4940 | 0.8828 | 0.0704  | 254.351       | 0.240     | 0.253     |
| next ligand:           |      |        |        |         |               |           |           |
| 5                      | O67  | 0.1922 | 0.4657 | -0.0500 | 303.878       | 0.002     | 0.002     |
| last ligand:           |      |        |        |         |               |           |           |
| 26                     | O23  | 0.4070 | 0.9385 | 0.1850  | 485.025       | 0.000     | 0.000     |
| coordination number: 4 |      |        |        |         |               |           |           |

| #                      | atom       | x      | y       | z      | distance / pm | e-ECoN(1) | e-ECoN(1) |
|------------------------|------------|--------|---------|--------|---------------|-----------|-----------|
| ZT                     | <b>Sn2</b> | 0.3654 | 0.4301  | 0.1622 |               |           |           |
| 1                      | O45        | 0.1517 | 0.4751  | 0.1431 | 226.890       | 1.283     | 1.354     |
| 2                      | O13        | 0.3492 | 0.677   | 0.2038 | 235.164       | 1.071     | 1.146     |
| 3                      | F1         | 0.3465 | 0.5729  | 0.0792 | 231.556       | 0.933     | 1.008     |
| 4                      | O12        | 0.2643 | 0.3967  | 0.2559 | 253.278       | 0.636     | 0.706     |
| 5                      | O47        | 0.2044 | 0.2539  | 0.0918 | 274.322       | 0.260     | 0.308     |
| 6                      | O21        | 0.3261 | 0.1487  | 0.2324 | 297.903       | 0.051     | 0.069     |
| next ligand:           |            |        |         |        |               |           |           |
| 7                      | O34        | 0.5348 | 0.7312  | 0.1543 | 314.162       | 0.012     | 0.017     |
| last ligand:           |            |        |         |        |               |           |           |
| 30                     | O45        | 0.6517 | -0.0249 | 0.1431 | 495.068       | 0.000     | 0.000     |
| coordination number: 3 |            |        |         |        |               |           |           |

**Table S5: Results for the MAPLE calculations for all atoms in Sn<sub>2</sub>[B<sub>7</sub>O<sub>12</sub>]F, regarding charge, distance, obtained charge, partial maple factor (PMF) and MAPLE energies (\*MAPLE: MAPLE / charge).**

|                                        | charge  | distance / pm | obtained charge | PMF                                         | MAPLE     | *MAPLE   |
|----------------------------------------|---------|---------------|-----------------|---------------------------------------------|-----------|----------|
| Sn1                                    | +2.0000 | 205.65        | -1.39494        | 1.86056                                     | 462.8564  | 115.7141 |
| Sn2                                    | +2.0000 | 226.89        | -1.40853        | 1.87868                                     | 467.3642  | 116.8410 |
| B1                                     | +3.0000 | 142.58        | -3.01372        | 6.02950                                     | 1499.9758 | 166.6640 |
| B2                                     | +3.0000 | 133.60        | -2.91160        | 5.82519                                     | 1449.1479 | 161.0164 |
| B3                                     | +3.0000 | 135.56        | -2.81866        | 5.63925                                     | 1402.8917 | 155.8769 |
| B4                                     | +3.0000 | 145.53        | -2.99659        | 5.99522                                     | 1491.4468 | 165.7163 |
| B5                                     | +3.0000 | 133.38        | -2.89111        | 5.78418                                     | 1438.9467 | 159.8830 |
| B6                                     | +3.0000 | 136.42        | -2.85777        | 5.71750                                     | 1422.3572 | 158.0397 |
| B7                                     | +3.0000 | 135.38        | -3.07488        | 6.15186                                     | 1530.4156 | 170.0462 |
| F1                                     | -1.0000 | 205.65        | 0.62123         | 0.41430                                     | 103.0658  | 103.0658 |
| O12                                    | -2.0000 | 135.45        | 2.20655         | 2.94308                                     | 732.1569  | 183.0392 |
| O13                                    | -2.0000 | 137.05        | 2.23817         | 2.98525                                     | 742.6476  | 185.6619 |
| O15                                    | -2.0000 | 133.38        | 2.23210         | 2.97714                                     | 740.6319  | 185.1580 |
| O21                                    | -2.0000 | 133.60        | 2.20433         | 2.94010                                     | 731.4175  | 182.8544 |
| O23                                    | -2.0000 | 137.58        | 2.47381         | 3.29954                                     | 820.8359  | 205.2090 |
| O34                                    | -2.0000 | 135.56        | 2.17716         | 2.90386                                     | 722.4019  | 180.6005 |
| O45                                    | -2.0000 | 138.70        | 2.21228         | 2.95072                                     | 734.0580  | 183.5145 |
| O46                                    | -2.0000 | 137.23        | 2.26916         | 3.02657                                     | 752.9289  | 188.2322 |
| O47                                    | -2.0000 | 135.38        | 2.10851         | 2.81230                                     | 699.6245  | 174.9061 |
| O56                                    | -2.0000 | 136.42        | 2.35477         | 3.14077                                     | 781.3377  | 195.3344 |
| O67                                    | -2.0000 | 136.66        | 2.28826         | 3.05205                                     | 759.2663  | 189.8166 |
| O7                                     | -2.0000 | 136.01        | 1.74826         | 2.33180                                     | 580.0892  | 145.0223 |
| Madelung constant:                     |         |               |                 | 80.6594 ± 0.000003                          |           |          |
| Coulomb portion of the lattice energy: |         |               |                 | 20065.8645 ± 0.00083 kcal·mol <sup>-1</sup> |           |          |
| Coulomb portion of the lattice energy: |         |               |                 | 83995.7292 ± 0.003472 kJ·mol <sup>-1</sup>  |           |          |

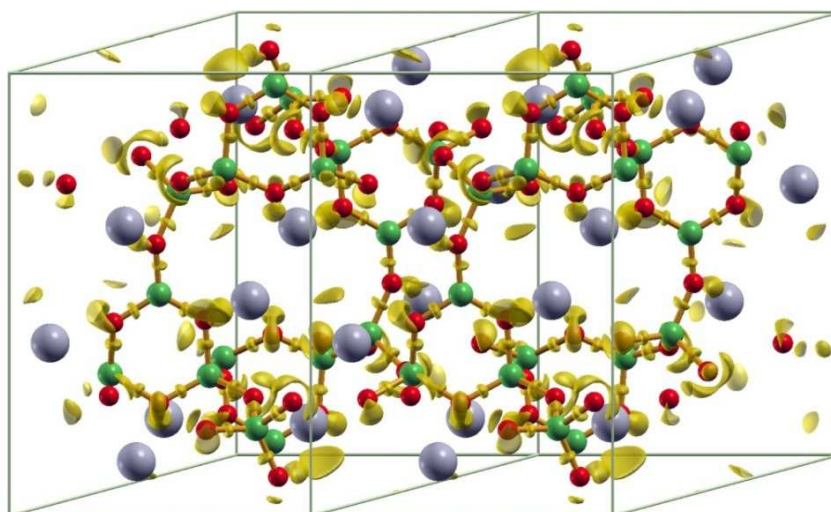

Figure S1: Electron localization function (ELF) (isosurface at 0.86) showing the attractors of the B-O bonds and the lone pairs of the oxygen anions and the tin cations.

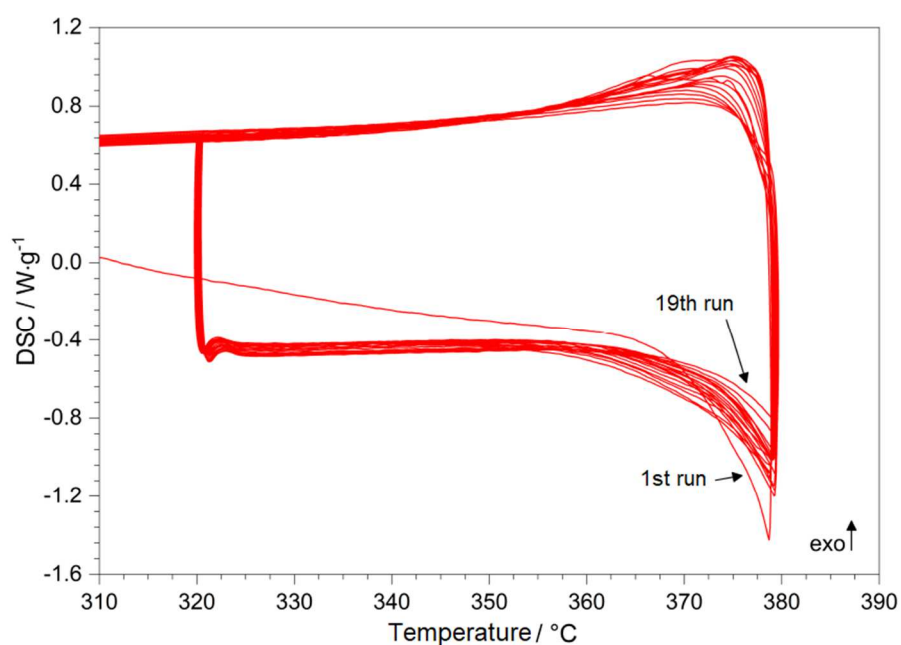

Figure S2: DSC measurement that led to the synthesis of a single crystal of  $\text{Sn}_2[\text{B}_7\text{O}_{12}]\text{F}$ ; the sample was heated to a temperature within the endothermic peak of the original DSC measurement (Fig. 4) and then cooled again. After 18 repetitions of this cycle, the crucible was opened and a large crystal was found.

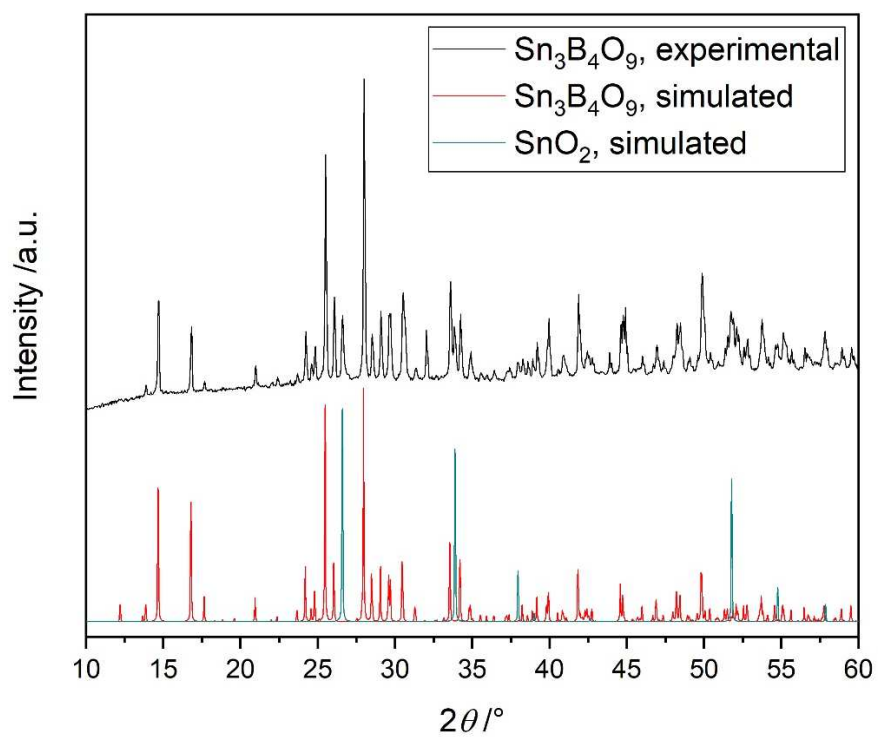

**Figure S3: Powder diffraction pattern of the final product tin borate; shown are the calculated patterns of SnO<sub>2</sub> and tin borate.**
